# Supplementary material for: Gut Microbiome and Cytokine Profiles in Post-COVID Syndrome
Source: MDPI journal article supplement (doi:10.3390/v16050722), 2024-05-02
Supplement: s1 [file s1]

**Supplementary Table S1. Demographics, baseline characteristics and laboratory characteristics of control and COVID-19 patients according to gender.**

| Characteristic                                                                                                          | Healthy Control   |                   | Covid Group       |                   | p value |
|-------------------------------------------------------------------------------------------------------------------------|-------------------|-------------------|-------------------|-------------------|---------|
|                                                                                                                         | Female<br>n=26    | Male<br>n=25      | Female<br>n=30    | Male<br>n=30      |         |
| <b>Demographics</b>                                                                                                     |                   |                   |                   |                   |         |
| Age (median, IQR)                                                                                                       | 49(28, 65)        | 56 (36, 68)       | 63 (34, 88)       | 60 (26, 90)       | 0.56    |
| <b>Comorbidities (n, %)</b>                                                                                             |                   |                   |                   |                   |         |
| Obesity                                                                                                                 | 7 (27%)           | 6 (24%)           | 22 (76%)          | 13 (50%)          | 0.05    |
| Arterial hypertension                                                                                                   | -                 | 3 (12%)           | 19 (63%)          | 11 (48%)          | 0.06    |
| Cardiovascular diseases                                                                                                 | -                 | 2 (8%)            | 10 (37%)          | 7 (32%)           | 0.57    |
| Diabetes                                                                                                                | -                 | -                 | 8 (29%)           | 5 (21%)           | 0.2     |
| Intestinal disorders                                                                                                    | -                 | -                 | 9 (32%)           | 13 (54%)          | 0.2     |
| Pneumonia                                                                                                               | -                 | -                 | 30 (100%)         | 30 (100%)         |         |
| Active cancer                                                                                                           | -                 | -                 | 4 (14%)           | 0 (0%)            |         |
| Respiratory failure                                                                                                     | -                 | -                 | 10 (36%)          | 9 (37%)           |         |
| <b>Laboratory result</b>                                                                                                |                   |                   |                   |                   |         |
| Hemoglobin, g/dL                                                                                                        | 131.5 (101, 162)  | 137.3 (93, 164)   | 130 (63, 166)     | 137 (95, 164)     | 0.07    |
| Red blood cells, 10 <sup>3</sup> μL                                                                                     | 4.3 (3.78, 5.20)  | 4.42 (3.78, 519)  | 4.68 (2.70, 7.30) | 4.90 (3.24, 5.59) | 0.2     |
| Platelet, 10 <sup>3</sup> μL                                                                                            | 233.1 (141, 321)  | 235.76 (87, 402)  | 207 (108, 452)    | 233 (150, 344)    | 0.16    |
| White blood cell, 10 <sup>3</sup> μL                                                                                    | 5.7 (4.4, 9.7)    | 6.26 (3.1, 8.7)   | 6.42 (2.3, 28.2)  | 7.04 (3.3, 14.7)  |         |
| Lymphocytes, 10 <sup>3</sup> μL                                                                                         | 36.6 (31.5, 56.5) | 34.32 (14.5,47.2) | 22.9 (6, 47)      | 18.2 (0.5, 96)    | 0.19    |
| Stab neutrophils                                                                                                        | -                 | -                 | 8.1 (1, 29)       | 9.05 (2, 30)      | 0.34    |
| Segmented neutrophils                                                                                                   | -                 | -                 | 59.5 (1, 78)      | 68.1 (5, 91)      | 0.08    |
| ESR, mm/h                                                                                                               | -                 | -                 | 23.1 (2, 42)      | 11.7 (4, 29)      | 0.006   |
| Total protein mg/dL                                                                                                     | -                 | -                 | 67.06 (59, 77.23) | 64.8 (56, 75.88)  | 0.06    |
| Albumin, g/dL                                                                                                           | -                 | -                 | 36.6 (32, 47.45)  | 37.8(29.69,45.8)  | 0.2     |
| Glucose, mg/dL                                                                                                          | 5.3 (4.45, 8.37)  | 5.4 (4.07, 8.67)  | 6.51 (3, 7.69)    | 7.04 (3.8, 15.8)  | 0.28    |
| Urea mg/dL                                                                                                              | 12.1 (7.39, 18.3) | 11.8(5.71, 24.63) | 5.93 (3.13, 14)   | 6.85(3.05, 17.84) | 0.21    |
| Total bilirubin, mg/dL                                                                                                  | 10.79(5.64,18.8)  | 16.87(9.8, 40.36) | 15.9 (11.5, 28)   | 18.2 (7, 38.42)   | 0.11    |
| AST, U/L                                                                                                                | 20.7 (14, 41.6)   | 24.3 (12.5, 38.8) | 39.2 (11, 82.31)  | 40.2 (20, 107.66) | 0.4     |
| ALT, U/L                                                                                                                | 14.5 (8.1, 50.3)  | 23.4 (9.3, 77.8)  | 30.9(11.57,75.8)  | 34.5(11.56,153.)  | 0.3     |
| <b>Abbreviations:</b> ESR: erythrocyte sedimentation rate, AST: aspartate aminotransferase), ALT: alanine transaminase. |                   |                   |                   |                   |         |
