# Supplementary material for: Gut Microbiome and Cytokine Profiles in Post-COVID Syndrome
Source: MDPI journal article supplement (doi:10.3390/v16050722), 2024-05-02
Supplement: s1 [file s1]

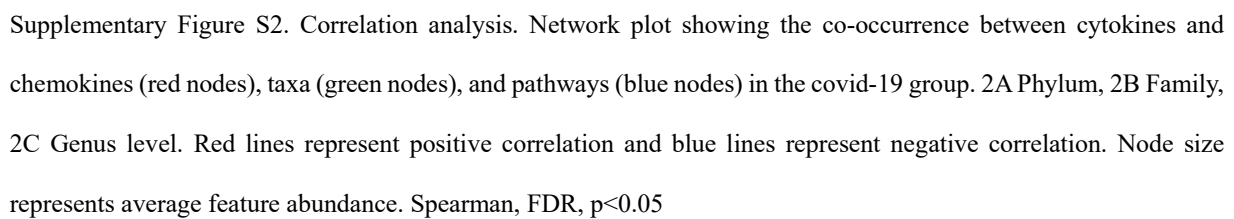

Supplementary Figure S2. Correlation analysis. Network plot showing the co-occurrence between cytokines and chemokines (red nodes), taxa (green nodes), and pathways (blue nodes) in the covid-19 group. 2A Phylum, 2B Family, 2C Genus level. Red lines represent positive correlation and blue lines represent negative correlation. Node size represents average feature abundance. Spearman, FDR,  $p < 0.05$
