# Supplementary material for: Gut Microbiome and Cytokine Profiles in Post-COVID Syndrome
Source: MDPI journal article supplement (doi:10.3390/v16050722), 2024-05-02
Supplement: s1 [file s1]

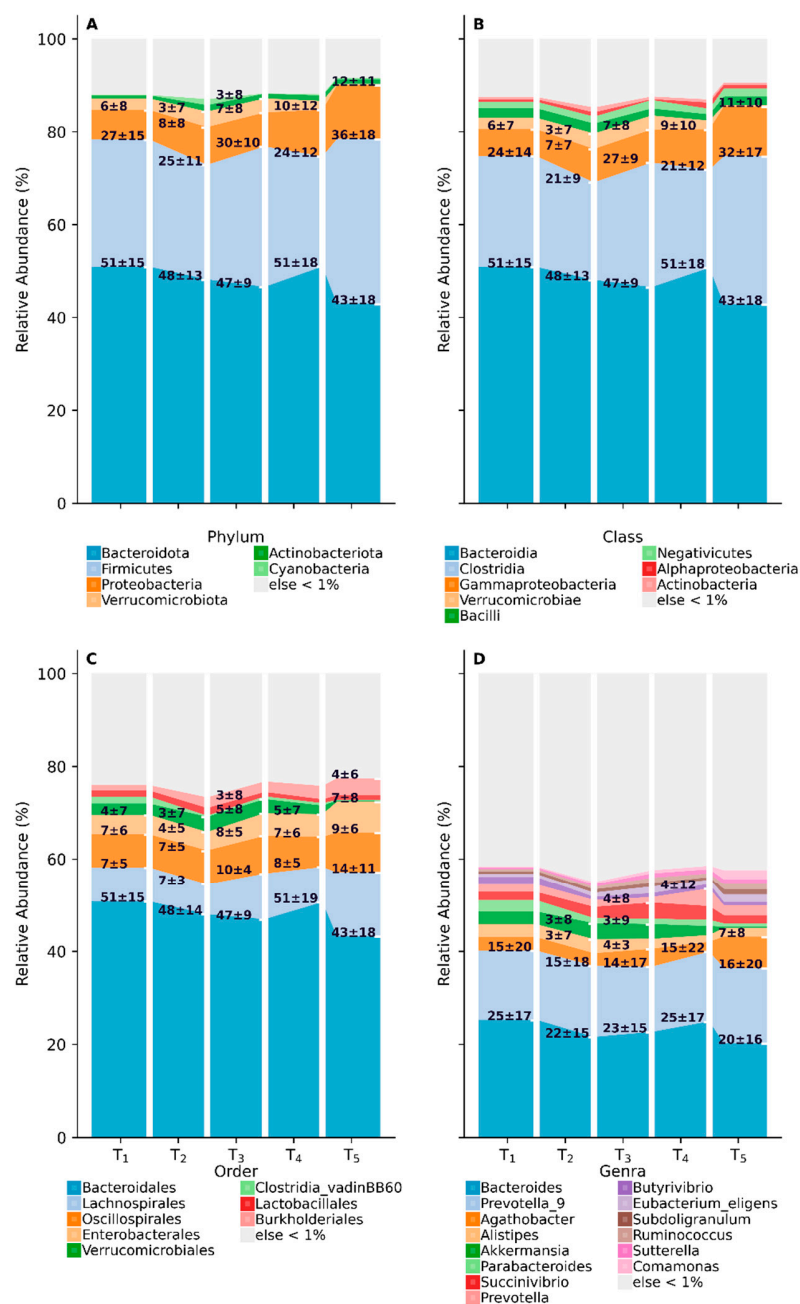

Supplementary Figure S4. Stacked barplots showing the average relative abundance of bacterial OTUs in the acute period - T1, 2 weeks - T2, 1 month - T3, 6 months - T4 and 1 year - T5 after disease onset, classified into: 5A Phylum, 5B Class, 5C Order, 5D Genus levels. Relative abundance is represented by the height of the bar. Only taxa with the highest relative abundance (>1%) at each level are displayed
