# Supplementary material for: Gut Microbiome and Cytokine Profiles in Post-COVID Syndrome
Source: Viruses. 2024 May 2;16(5):722. doi: 10.3390/v16050722 (PMC11126011; doi:10.3390/v16050722)
Supplement: Supplementary file 1 [file viruses-16-00722-s001.zip › Table S2.xlsx]

## Sheet: covid-19_Phylum
Supplementary table 2. Relative Abundance of Bacterial Taxa in control and covid group
covid-19_Phylum	CV022_1	CV035_1	CV043_1	CV010_1	CV038_1	CV055_1	CV054_1	CV031_1	CV050_1	CV014_1	CV044_1	CV057_1	CV001_1	CV002_1	CV005_1
p__Bacteroidota	26.5413	32.0201	32.692	39.1424	50.3531	51.8285	52.1642	53.1046	54.6685	58.4828	60.12	60.4555	70.4301	70.8006	74.9863
p__Firmicutes	66.6388	34.2094	60.4053	31.5083	30.4503	39.3785	44.2506	37.7499	38.5157	35.1364	37.0966	13.9739	22.4448	22.7876	15.2839
p__Proteobacteria	2.12358	13.0241	3.79894	17.8555	1.19064	2.06018	0.818315	4.05642	2.84663	0.75712	0.415403	16.3768	2.9367	2.08948	6.83089
p__Actinobacteriota	0.351876	0.564779	0.38181	1.60726	0.201177	3.67879	0.223052	1.3421	0.408811	0.176297	0	0.236336	0.371543	0	0.369904
p__Fusobacteriota	0	0	0	0	0	0	0	0.291701	0	0	0	0	0	0	0
Control Phylum	AK053_c	AK040_c	AK054_c	AK003_c	AK013_c	RA84_c	AK012_c	C167_c	C187_c	AK009_c	C178_c	C188_c	RA57_c	C191_c	C183_c
p__Bacteroidota	2.5055	10.9655	11.7207	12.6486	15.4717	15.9453	27.4323	29.5147	34.1623	36.0606	36.3763	50.4249	51.6231	55.1641	58.0817
p__Firmicutes	10.5876	11.9208	14.1286	8.35041	21.1286	78.3016	15.7936	19.6847	27.2607	26.519	15.8629	23.6914	43.8614	18.4418	17.2892
p__Proteobacteria	11.0616	52.072	13.8812	43.244	17.9012	3.3399	14.2065	27.0835	3.44875	5.21633	23.8503	8.34234	1.73831	10.4333	11.2556
p__Actinobacteriota	6.53424	6.81601	27.649	13.344	9.95149	0.245018	4.29295	4.30038	19.5721	3.91123	4.2856	4.00832	0.263133	4.4687	1.96885
p__Fusobacteriota	0.467219	1.78225	3.46279	1.61215	4.34379	0	14.044	3.76574	2.5606	19.7379	2.18449	2.997	0	1.32791	3.5483
covid-19_Class	CV022_1	CV035_1	CV043_1	CV010_1	CV038_1	CV055_1	CV054_1	CV031_1	CV050_1	CV014_1	CV044_1	CV057_1	CV001_1	CV002_1	CV005_1
c__Bacteroidia	26.4537	32.0009	32.6728	38.4261	50.2983	51.8011	52.1231	53.0978	54.6207	58.4418	60.1145	60.4418	70.0949	70.791	75.0093
c__Gammaproteobacteria	2.02637	12.8873	3.75789	11.3623	1.16601	2.0178	0.76221	3.99069	2.8439	0.75712	0.397639	15.9752	2.34079	2.08948	5.03352
c__Clostridia	59.782	31.9161	56.1439	26.5803	27.9882	38.3778	42.3923	26.4804	36.5674	33.6167	35.4336	13.4957	19.2365	22.0843	11.8221
c__Negativicutes	1.67723	0.306321	1.04142	1.70737	1.21117	0.170884	0.50221	3.64147	0.609798	0.127098	0.209068	0.277319	1.68669	0.111985	3.33192
c__Actinobacteria	0	0.288543	0	1.04805	0	3.61727	0	0.96138	0.28439	0	0	0.180325	0.213921	0	0.185106
c__Bacilli	5.04128	1.9651	3.15575	3.23343	1.24949	0.817509	1.34652	7.61846	1.30163	1.39124	1.43478	0.195353	1.52625	0.584508	0.11792
c__Fusobacteriia	0	0	0	0	0	0	0	0.291701	0	0	0	0	0	0	0
control_Class	AK053_c	AK040_c	AK054_c	AK003_c	AK013_c	RA84_c	AK012_c	C167_c	C187_c	AK009_c	C178_c	C188_c	RA57_c	C191_c	C183_c
c__Bacteroidia	2.50553	10.9655	11.7194	12.6486	15.4722	15.9371	27.4309	29.5038	34.1541	36.0552	36.364	50.4153	51.6149	55.1613	58.0516
c__Gammaproteobacteria	11.0112	52.0665	13.8348	43.2358	17.8812	2.4666	14.1887	27.0288	3.349	5.1562	23.8066	8.32318	1.62242	10.4238	11.2064
c__Clostridia	0.315582	1.01823	1.3228	0.367516	0.422229	69.8492	5.36653	1.90885	0.952368	0.814497	1.19751	5.89821	39.9389	1.12571	1.07665
c__Negativicutes	3.70775	3.1531	3.88505	5.24497	4.13894	0.793912	5.55776	12.0848	14.7323	19.7761	9.47616	6.57562	3.27212	12.2435	14.2875
c__Actinobacteria	6.43733	6.67113	27.5165	13.303	9.84928	0	4.04436	4.0816	19.1936	3.55864	4.05594	3.64567	0.136338	4.1258	1.80626
c__Bacilli	6.56439	7.7495	8.92071	2.73793	16.5681	7.64893	4.86935	5.691	11.576	5.92834	5.1892	11.2175	0.583528	5.07254	1.92513
c__Fusobacteriia	0.467226	1.78225	3.46279	1.61215	4.3439	0	14.044	3.76574	2.5606	19.7379	2.18449	2.997	0	1.32791	3.5483
covid-19_Order	CV022_1	CV035_1	CV043_1	CV010_1	CV038_1	CV055_1	CV054_1	CV031_1	CV050_1	CV014_1	CV044_1	CV057_1	CV001_1	CV002_1	CV005_1
o__Bacteroidales	27.927	31.9583	33.5283	37.1153	50.1958	51.9133	52.5046	54.2651	54.8074	57.369	60.2001	60.5821	70.2643	70.911	74.4999
o__Enterobacterales	1.25554	10.7841	3.43005	0.265099	0.187503	0.948764	0.46667	2.16711	0.750485	0.486155	0.210806	15.202	1.12676	2.0385	0.820459
o__Burkholderiales	0.889341	1.99808	0.432632	5.66247	0.983014	0.818515	0.298227	1.87243	1.79511	0.272521	0.187535	0.814957	0.927102	0	2.06761
o__Lactobacillales	0.835574	1.36913	1.24998	2.97921	0.839629	0.501803	0.927818	6.87496	0.996522	1.32974	0.698123	0.165731	1.27337	0.388546	0
o__Oscillospirales	31.8099	11.9322	24.0653	23.1338	21.5712	14.8087	16.8429	10.6551	14.8447	5.62296	30.1671	7.69073	13.5002	1.19437	5.7487
o__Fusobacteriales	0	0	0	0	0	0	0	0.300321	0	0	0	0	0	0	0
o__Micrococcales	0	0	0	0.110809	0	0	0	0.476566	0	0	0	0	0	0	0
o__Lachnospirales	16.5647	15.1428	24.3373	3.26255	5.60029	21.3431	23.8872	14.3619	19.1882	5.14776	4.68564	5.37324	5.57518	20.3836	5.58543
o__Corynebacteriales	0	0	0	0	0	0	0	0.35672	0	0	0	0	0	0	0
control_Order	AK053_c	AK040_c	AK003_c	AK054_c	AK013_c	RA84_c	AK012_c	C167_c	C178_c	C187_c	AK009_c	RA57_c	C188_c	C191_c	C183_c
o__Bacteroidales	2.52812	9.63314	9.96728	11.6584	14.5518	16.5062	30.0228	31.3166	38.2604	39.8674	44.6915	52.453	54.6155	62.0641	67.8386
o__Enterobacterales	9.06147	43.1655	37.9348	11.2929	10.8692	1.69999	4.81281	15.2844	14.8554	3.04943	2.95996	0.649668	6.18594	3.49683	10.9769
o__Burkholderiales	2.35911	10.7931	7.52411	2.74114	7.38107	0.528278	10.7353	15.4878	11.3894	0.761152	3.40234	0.989837	2.41811	8.23004	2.11365
o__Lactobacillales	3.54789	4.87684	2.28894	7.80623	16.5806	0.169855	3.94433	5.30548	4.62733	12.7919	6.97376	0	9.8984	5.36233	1.4951
o__Oscillospirales	0	0.130465	0	0	0	56.7719	0	0.434953	0.13039	0	0	19.7675	1.38862	0	0
o__Fusobacteriales	0.48574	1.8492	1.70085	3.63287	4.54825	0	15.5029	4.30885	2.42283	3.00928	24.6686	0	3.27702	1.51737	4.16159
o__Micrococcales	3.8916	5.47953	6.23261	25.9505	8.20087	0	2.04906	1.18282	1.93159	6.89373	2.13158	0	2.89844	1.50801	0.543234
o__Lachnospirales	0.166174	0.619709	0.273866	0.508946	0.216038	9.93652	1.50174	0.860518	0.768694	0.515464	0.729316	15.217	1.64898	0.83362	0.5208
o__Corynebacteriales	1.97137	0.818242	5.61858	2.06159	1.42499	0	0.532244	2.30462	1.36758	12.551	1.44838	0	0.339673	1.45805	0.645792
covid-19_Genus	CV001_1	CV002_1	CV014_1	CV022_1	CV035_1	CV038_1	CV043_1	CV044_1	CV050_1	CV054_1	CV055_1	CV057_1	CV010_1	CV031_1	CV005_1
g__Prevotella_7	0	0	0	0	0	0	0	0	0	0	0	0	0.248635	0.410084	0.68848
g__Haemophilus	0	0	0	0	0	0	0	0	0	0	0	0	0	0.540692	0
g__Prevotella	16.0501	3.46571	0	0.726093	0.247005	0.41463	0.59284	0.158125	0.242701	0.241146	0	0.39809	5.5102	0.752756	0.603979
g__Neisseria	0	0	0	0	0	0	0	0	0	0	0	0	0	0.650235	0
g__Rothia	0	0	0	0	0	0	0	0	0	0	0	0	0	0.474686	0
g__Leptotrichia	0	0	0	0	0	0	0	0	0	0	0	0	0	0.283688	0
g__Streptococcus	0	0.337913	0.256956	0.313744	0	0.151034	0.332449	0	0.771186	0.32976	0	0	0	3.38038	0
g__Bacteroides	1.52524	60.1025	36.3081	10.5741	28.3126	26.1018	24.8059	51.292	46.7896	32.9731	37.913	46.5361	2.05231	6.07823	5.59511
g__Faecalibacterium	8.59807	0.71632	2.00453	6.22826	2.55465	14.361	10.7514	26.9159	7.63718	2.99399	8.43002	6.80314	17.2032	7.35482	4.20014
g__Alloprevotella	4.61925	0	0	2.90437	0	0.257897	0.601028	0.109578	0	0.149627	0	0	3.01092	0.37076	0
g__Veillonella	0	0	0	0	0	0	0	0	0	0	0	0	0	0.271048	0
g__Porphyromonas	0	0	0	0	0	0	0	0	0.106271	0	0	0	0	0.39604	0
g__Granulicatella	0	0	0	0	0	0	0	0	0	0	0	0	0	0.157292	0
g__Prevotella_9	45.6771	1.42007	0	5.97727	0.976179	2.38804	2.42868	2.51751	2.65535	1.22752	1.11329	4.00356	26.1469	42.5181	66.838
g__Butyrivibrio	0.397461	7.74268	0.696267	8.03543	9.52155	0.998817	9.3446	1.90166	4.50505	1.60086	1.32088	1.35772	0.130785	0.947967	0.243808
g__Blautia	2.00135	6.57674	1.16597	2.70716	1.65967	1.61293	6.49668	0.488245	4.99619	10.0657	6.43093	1.49203	0.947111	2.22597	0.519477
g__Parabacteroides	0.358136	3.886	13.9032	8.91391	1.43297	3.85563	2.28293	5.65088	3.77982	2.01923	1.59671	11.3067	0.112101	0.539288	0.308916
g__Lachnospiraceae_NK4A136_group	0.536502	2.4394	0.967038	3.3705	1.10814	0.477324	2.29111	0.296831	2.10532	1.58343	6.23329	0.687758	0.241449	1.29485	0.673242
g__Alistipes	0	0	4.19694	1.74621	1.53279	14.7258	0.579739	0.116513	0.855916	17.239	1.85549	1.87717	0	0.449407	0.277054
conntrol_Genus	RA57_c	RA84_c	AK053_c	AK040_c	AK054_c	AK003_c	AK013_c	C167_c	AK012_c	C178_c	C187_c	C183_c	AK009_c	C188_c	C191_c
g__Prevotella_7	0	0	1.36779	3.97484	4.11786	4.67458	9.12192	11.7631	15.1397	20.1834	21.0557	25.1651	28.6191	39.2157	39.9626
g__Haemophilus	0	0	8.17665	40.2024	10.1846	35.2814	9.64384	12.4364	4.12677	12.7269	2.36629	6.41693	2.10768	4.4739	2.62654
g__Prevotella	0.579495	0.684399	0.677744	1.93888	5.6431	2.63586	2.4589	6.35976	10.1796	7.40705	9.43778	13.7992	4.92749	7.45192	9.26123
g__Neisseria	0	0	1.91435	9.2131	2.24275	6.20773	5.70548	13.1634	9.42285	10.1818	0.433842	1.68216	2.14459	1.59341	6.29578
g__Rothia	0	0	3.54176	5.28338	24.7345	5.90848	7.85206	1.03477	1.85643	1.75036	5.86303	0.464139	1.70583	2.66071	1.31874
g__Leptotrichia	0	0	0.441353	1.54235	3.06004	1.52085	3.8589	3.66772	13.8611	2.1271	2.51683	3.49066	19.7045	2.9533	1.31191
g__Streptococcus	0	0	2.17261	2.51453	6.32508	1.49215	12.6082	2.50378	2.29902	2.74585	9.08469	0.768988	4.73066	7.74725	3.02422
g__Bacteroides	41.7266	11.0068	0	0	0	0	0	0	0	0.313497	0	0	0	0	0
g__Faecalibacterium	9.04309	31.8146	0	0	0	0	0	0	0	0	0	0	0	0	0
g__Alloprevotella	0.405646	0	0.154405	1.03097	0.58358	0.515147	0.868493	4.84403	1.2185	3.22984	2.90551	16.7186	1.58418	2.68269	2.67847
g__Veillonella	0.188707	0	0.373032	0.72332	0.591781	0.326579	0.587671	2.10114	0.759511	2.46398	4.7969	4.88582	10.5384	2.36264	1.29961
g__Porphyromonas	0	0	0.173535	1.45895	0.314341	1.43066	1.26712	3.94668	0.51909	2.86272	0.409208	1.29355	0.568609	0.203297	2.11955
g__Granulicatella	0	0	1.11363	1.88282	0.697016	0.5944	2.21644	1.278	1.18844	1.32961	1.26184	0.302102	0.788671	1.10989	1.40073
g__Prevotella_9	4.55275	2.74522	0	0.53326	0	0	0	0	0	0.376746	0	0	0	0.149725	0
g__Butyrivibrio	2.01337	0.574651	0	0.170917	0.233706	0.107949	0	0.342174	0.972611	0.362996	0.258663	0.22383	0.315742	0.792582	0.558926
g__Blautia	4.44577	2.31842	0	0	0	0	0	0	0	0	0	0	0	0	0
g__Parabacteroides	3.77415	1.16302	0	0	0	0	0	0.221245	0	0	0	0.876097	0	0	0
g__Lachnospiraceae_NK4A136_group	1.34175	0.75604	0	0	0	0	0	0	0	0	0	0	0	0	0
g__Alistipes	0.947994	0.978584	0	0	0	0	0	0	0	0	0	0	0	0	0
