# Supplementary material for: Gut Microbiome and Cytokine Profiles in Post-COVID Syndrome
Source: Viruses. 2024 May 2;16(5):722. doi: 10.3390/v16050722 (PMC11126011; doi:10.3390/v16050722)
Supplement: Supplementary file 1 [file viruses-16-00722-s001.zip › Table S3.xlsx]

## Sheet: Sheet1
Supplementary table 3. Linear discriminant analysis (LDA) results with effect size in control and covid group
feature	log of the highest class average	LDA effect size	p-value	class
k__Bacteria.p__Bacteroidota	3.07898	2.31383	6.490605466356778e-26	covid
k__Bacteria.p__Proteobacteria	2.6777	2.24119	1.1380456757351614e-36	control
k__Bacteria.p__Actinobacteriota.c__Actinobacteria	2.35793	2.02433	9.005598650362667e-55	control
k__Bacteria.p__Bacteroidota.c__Bacteroidia	3.07813	2.30998	3.6251300312310387e-25	covid
k__Bacteria.p__Firmicutes.c__Clostridia	2.87412	2.42619	2.9609572325359043e-44	covid
k__Bacteria.p__Firmicutes.c__Negativicutes	2.35038	2.00847	8.075862704422109e-63	control
k__Bacteria.p__Proteobacteria.c__Gammaproteobacteria	2.67506	2.25797	1.407118672836858e-37	control
k__Bacteria.p__Bacteroidota.c__Bacteroidia.o__Bacteroidales	3.07879	2.24044	9.017023206445858e-15	covid
k__Bacteria.p__Firmicutes.c__Clostridia.o__Lachnospirales	2.46138	2.06757	5.162973087518718e-57	covid
k__Bacteria.p__Firmicutes.c__Clostridia.o__Oscillospirales	2.56116	2.07674	2.961815645522046e-45	covid
k__Bacteria.p__Proteobacteria.c__Gammaproteobacteria.o__Enterobacterales	2.52965	2.13795	2.9609572325359043e-44	control
k__Bacteria.p__Bacteroidota.c__Bacteroidia.o__Bacteroidales.f__Bacteroidaceae	2.76868	2.41096	5.162973087518718e-57	covid
k__Bacteria.p__Bacteroidota.c__Bacteroidia.o__Bacteroidales.f__Prevotellaceae	2.80265	2.08761	6.539691426894586e-16	control
k__Bacteria.p__Firmicutes.c__Clostridia.o__Lachnospirales.f__Lachnospiraceae	2.45186	2.06324	5.162973087518718e-57	covid
k__Bacteria.p__Firmicutes.c__Negativicutes.o__Veillonellales_Selenomonadales.f__Veillonellaceae	2.30201	2.0002	1.0436831196962389e-72	control
k__Bacteria.p__Proteobacteria.c__Gammaproteobacteria.o__Enterobacterales.f__Pasteurellaceae	2.4909	2.19084	1.2341943603564655e-61	control
k__Bacteria.p__Bacteroidota.c__Bacteroidia.o__Bacteroidales.f__Bacteroidaceae.g__Bacteroides	2.79918	2.43739	5.162973087518718e-57	covid
k__Bacteria.p__Bacteroidota.c__Bacteroidia.o__Bacteroidales.f__Prevotellaceae.g__Prevotella_7	2.60164	2.30295	9.005598650362667e-55	control
k__Bacteria.p__Bacteroidota.c__Bacteroidia.o__Bacteroidales.f__Prevotellaceae.g__Prevotella_9	2.49307	2.17675	2.7369870932111423e-47	covid
k__Bacteria.p__Proteobacteria.c__Gammaproteobacteria.o__Enterobacterales.f__Pasteurellaceae.g__Haemophilus	2.46488	2.1632	4.9846071038924375e-64	control
k__Bacteria.p__Proteobacteria.c__Gammaproteobacteria.o__Enterobacterales.f__Pasteurellaceae.g__Haemophilus.s__Haemophilus_parainfluenzae	2.43885	2.13362	1.7823924061590807e-60	control
k__Bacteria.p__Actinobacteriota	2.89751	2.56368	1.1429724254493642e-53	control
k__Bacteria.p__Firmicutes.c__Negativicutes.o__Veillonellales_Selenomonadales	2.52326	2.21812	1.0436831196962389e-72	control
