# Supplementary material for: Gut Microbiome and Cytokine Profiles in Post-COVID Syndrome
Source: Viruses. 2024 May 2;16(5):722. doi: 10.3390/v16050722 (PMC11126011; doi:10.3390/v16050722)
Supplement: Supplementary file 1 [file viruses-16-00722-s001.zip › Table S4.xlsx]

## Sheet: S4
Supplementary table 4. Metabolic Pathways with Significant FDR in control and covid group
Pathway	covid: mean rel. freq. (%)	control: mean rel. freq. (%)	p-value-(adj)-fdr-corrected	95-lower-CI-(diff-mean-props)	95-upper-CI-(diff-mean-props)	KEGG metabolism	Pathway short name
4-deoxy-L-threo-hex-4-enopyranuronate degradation	0.330281	0.083065	4.68247e-07	-0.322195	-0.172237	Carbohydrates metabolism	4-deoxy-L-threo-hex-4-enopyranuronate degradation
6-hydroxymethyl-dihydropterin diphosphate biosynthesis I	0.457515	0.697073	0.00011704	0.13359	0.345525	Vitamins metabolism	6-hydroxymethyl-dihydropterin diphosphate biosynthesis I
6-hydroxymethyl-dihydropterin diphosphate biosynthesis III (Chlamydia)	0.48515	0.719061	0.000227581	0.123967	0.343854	Vitamins metabolism	6-hydroxymethyl-dihydropterin diphosphate biosynthesis III
adenosine nucleotides degradation II	0.270084	0.0541217	1.33511e-06	-0.287775	-0.14415	Nucleosides and Nucleotides metabolism	adenosine nucleotides degradation II
adenosylcobalamin biosynthesis from cobyrinate a,c-diamide I	0.59685	0.236084	1.60292e-05	-0.493316	-0.228218	Vitamins metabolism	adenosylcobalamin biosynthesis from cobyrinate a,c-diamide I
adenosylcobalamin salvage from cobinamide I	0.623523	0.247085	1.38657e-05	-0.512437	-0.240438	Vitamins metabolism	adenosylcobalamin salvage from cobinamide I
adenosylcobalamin salvage from cobinamide II	0.601288	0.237987	1.56587e-05	-0.496272	-0.23033	Vitamins metabolism	adenosylcobalamin salvage from cobinamide II
D-fructuronate degradation	0.45084	0.0959215	4.61502e-09	-0.442018	-0.26782	Carbohydrates metabolism	D-fructuronate degradation
D-galacturonate degradation I	0.360749	0.0680886	5.65817e-10	-0.357552	-0.22777	Carbohydrates metabolism	D-galacturonate degradation I
glucose and glucose-1-phosphate degradation	0.0523233	0.258994	1.98663e-05	0.130474	0.282867	Carbohydrates metabolism	glucose and glucose-1-phosphate degradation
glycogen biosynthesis I (from ADP-D-Glucose)	0.765451	0.486285	0.000329289	-0.416143	-0.142188	Carbohydrates metabolism	glycogen biosynthesis I
glycogen degradation I (bacterial)	0.82272	0.532128	0.000147184	-0.424406	-0.156776	Carbohydrates metabolism	glycogen degradation I
guanosine nucleotides degradation III	0.310423	0.0568112	1.86256e-08	-0.320278	-0.186947	Nucleosides and Nucleotides metabolism	guanosine nucleotides degradation III
heme biosynthesis I (aerobic)	0.0905571	0.340402	7.35034e-05	0.148492	0.351199	Cofactors, Prosthetic Groups, Electron Carriers metabolism	heme biosynthesis I
heme biosynthesis II (anaerobic)	0.158643	0.442599	0.00015211	0.158508	0.409404	Cofactors, Prosthetic Groups, Electron Carriers metabolism	heme biosynthesis II
inosine-5'-phosphate biosynthesis III	0.204063	0.535223	1.65107e-05	0.206999	0.45532	Nucleosides and Nucleotides metabolism	inosine-5'-phosphate biosynthesis III
L-arginine biosynthesis III (via N-acetyl-L-citrulline)	0.400206	0.197652	3.9455e-07	-0.265361	-0.139746	Amino Acids metabolism	L-arginine biosynthesis III
L-glutamate and L-glutamine biosynthesis	0.395609	0.151613	2.15547e-05	-0.342131	-0.145859	Amino Acids metabolism	L-glutamate and L-glutamine biosynthesis
L-histidine biosynthesis	0.681593	0.357645	5.7059e-06	-0.432317	-0.215579	Amino Acids metabolism	L-histidine biosynthesis
L-isoleucine biosynthesis IV	0.821189	0.524033	0.000222586	-0.431783	-0.162529	Amino Acids metabolism	L-isoleucine biosynthesis IV
L-methionine biosynthesis III	0.233492	0.581378	1.28696e-05	0.223112	0.472661	Amino Acids metabolism	L-methionine biosynthesis III
L-ornithine biosynthesis	0.470241	0.264999	1.76992e-06	-0.274246	-0.13624	Amino Acids metabolism	L-ornithine biosynthesis
L-rhamnose degradation I	0.259068	0.0388931	5.31061e-07	-0.286147	-0.154203	Carbohydrates metabolism	L-rhamnose degradation I
NAD biosynthesis I (from aspartate)	0.538507	0.337487	0.000137354	-0.287542	-0.114497	Cofactors, Prosthetic Groups, Electron Carriers metabolism	NAD biosynthesis I
NAD salvage pathway II	0.0318915	0.241223	6.09337e-05	0.127498	0.291165	Cofactors, Prosthetic Groups, Electron Carriers metabolism	NAD salvage pathway II
purine nucleotides degradation II (aerobic)	0.288461	0.0652765	7.84454e-08	-0.286369	-0.160001	Nucleosides and Nucleotides metabolism	purine nucleotides degradation II
pyruvate fermentation to propanoate I	0.398873	0.160922	5.96257e-05	-0.339183	-0.136719	Carbohydrates metabolism	pyruvate fermentation to propanoate I
starch degradation V	0.940049	0.663	0.00098207	-0.430028	-0.124069	Carbohydrates metabolism	starch degradation V
superpathay of heme biosynthesis from glutamate	0.144313	0.410151	4.94926e-05	0.161038	0.370638	Cofactors, Prosthetic Groups, Electron Carriers metabolism	superpathay of heme biosynthesis from glutamate
superpathway of &beta;-D-glucuronide and D-glucuronate degradation	0.25925	0.0579079	2.87856e-07	-0.260231	-0.142454	Carbohydrates metabolism	SP of &beta;-D-glucuronide and D-glucuronate degradation
superpathway of (R,R)-butanediol biosynthesis	0.0391245	0.259431	0.000530113	0.114363	0.326251	Carbohydrates metabolism	SP of (R,R)-butanediol biosynthesis
superpathway of demethylmenaquinol-8 biosynthesis	0.0959659	0.30355	1.77547e-05	0.129101	0.286067	Cofactors, Prosthetic Groups, Electron Carriers metabolism	SP of demethylmenaquinol-8 biosynthesis
superpathway of fatty acid biosynthesis initiation (E. coli)	0.352844	0.561873	0.00406556	0.0724688	0.34559	Fatty Acids and Lipids metabolism	SP of fatty acid biosynthesis initiation
superpathway of glucose and xylose degradation	0.391401	0.0939335	1.32864e-06	-0.395779	-0.199155	Carbohydrates metabolism	SP of glucose and xylose degradation
superpathway of hexuronide and hexuronate degradation	0.261961	0.0529411	5.89902e-08	-0.26567	-0.152369	Carbohydrates metabolism	SP of hexuronide and hexuronate degradation
superpathway of L-alanine biosynthesis	0.258822	0.525405	0.000267856	0.143011	0.390154	Amino Acids metabolism	SP of L-alanine biosynthesis
superpathway of menaquinol-11 biosynthesis	0.114925	0.331469	1.17352e-05	0.136103	0.296984	Cofactors, Prosthetic Groups, Electron Carriers metabolism	SP of menaquinol-11 biosynthesis
superpathway of menaquinol-12 biosynthesis	0.114925	0.331469	1.17352e-05	0.136103	0.296984	Cofactors, Prosthetic Groups, Electron Carriers metabolism	SP of menaquinol-12 biosynthesis
superpathway of menaquinol-13 biosynthesis	0.114925	0.331469	1.17352e-05	0.136103	0.296984	Cofactors, Prosthetic Groups, Electron Carriers metabolism	SP of menaquinol-13 biosynthesis
superpathway of menaquinol-7 biosynthesis	0.122861	0.334678	1.47292e-05	0.13167	0.291963	Cofactors, Prosthetic Groups, Electron Carriers metabolism	SP of menaquinol-7 biosynthesis
superpathway of menaquinol-8 biosynthesis I	0.123662	0.336773	1.19662e-05	0.133288	0.292933	Cofactors, Prosthetic Groups, Electron Carriers metabolism	SP of menaquinol-8 biosynthesis I
superpathway of S-adenosyl-L-methionine biosynthesis	0.301646	0.521096	2.30087e-05	0.131749	0.307152	Cofactors, Prosthetic Groups, Electron Carriers metabolism	SP of S-adenosyl-L-methionine biosynthesis
TCA cycle V (2-oxoglutarate:ferredoxin oxidoreductase)	0.636398	0.433645	1.51091e-06	-0.271065	-0.134441	Carbohydrates metabolism	TCA cycle V
thiazole biosynthesis I (E. coli)	0.50703	0.19193	5.2255e-08	-0.401891	-0.228309	Vitamins metabolism	thiazole biosynthesis I
tRNA processing	0.110573	0.350916	3.99578e-05	0.147024	0.333661	Nucleosides and Nucleotides metabolism	tRNA processing
