# Supplementary material for: Gut Microbiome and Cytokine Profiles in Post-COVID Syndrome
Source: Viruses. 2024 May 2;16(5):722. doi: 10.3390/v16050722 (PMC11126011; doi:10.3390/v16050722)
Supplement: Supplementary file 1 [file viruses-16-00722-s001.zip › Table S5.xlsx]

## Sheet: Phylum mean
	k__Bacteria|p__Bacteroidota	k__Bacteria|p__Firmicutes	k__Bacteria|p__Proteobacteria	k__Bacteria|p__Verrucomicrobiota	k__Bacteria|p__Actinobacteriota	k__Bacteria|p__Cyanobacteria
T1	51	27.4	6.3	2.5	0.7	0.1
T2	48.2	24.7	8.1	3.3	1.4	1.3
T3	46.6	30.2	7.3	3	1.1	0
T4	51	23.7	10	1.9	1.2	0.3
T5	42.9	35.5	11.6	0.3	1	0.3

## Sheet: Sheet1
Supplementary table 5. Compositional Gut Microbiome with Error Bars in covid group over time
	k__Bacteria|p__Bacteroidota	k__Bacteria|p__Firmicutes	k__Bacteria|p__Proteobacteria	k__Bacteria|p__Verrucomicrobiota	k__Bacteria|p__Actinobacteriota	k__Bacteria|p__Cyanobacteria
T1	14.8	14.5	7.7	5.2	0.8	0.2
T2	13.4	11.1	8.1	7.4	2.1	4.4
T3	9.4	9.9	7.8	8.2	0.9	0.1
T4	17.6	11.9	12.1	6.4	1.5	0.6
T5	18.4	17.9	11.1	0.3	1	0.5
	|c__Bacteroidia	|c__Clostridia	k__Bacteria|p__Proteobacteria|c__Gammaproteobacteria	k__Bacteria|p__Verrucomicrobiota|c__Verrucomicrobiae	k__Bacteria|p__Firmicutes|c__Bacilli	k__Bacteria|p__Firmicutes|c__Negativicutes	k__Bacteria|p__Proteobacteria|c__Alphaproteobacteria	k__Bacteria|p__Actinobacteriota|c__Actinobacteria
T1	50.9	23.9	5.8	2.5	2	1.4	0.5	0.5
T2	48.1	21	7.2	3.3	2.1	1.5	0.9	1.1
T3	46.6	26.8	7.1	3	1.5	1.8	0.2	0.6
T4	50.7	21.1	8.7	1.9	1.3	1.2	1.3	0.7
T5	42.9	31.9	10.7	0.3	1.9	1.7	0.8	0.5
	c__Bacteroidia	|c__Clostridia	k__Bacteria|p__Proteobacteria|c__Gammaproteobacteria	k__Bacteria|p__Verrucomicrobiota|c__Verrucomicrobiae	k__Bacteria|p__Firmicutes|c__Bacilli	k__Bacteria|p__Firmicutes|c__Negativicutes	k__Bacteria|p__Proteobacteria|c__Alphaproteobacteria	k__Bacteria|p__Actinobacteriota|c__Actinobacteria
T1	14.8	13.7	7.2	5.2	1.9	1.3	1.5	0.8
T2	13.4	9.4	6.9	7.4	3.1	1.8	1.9	2
T3	9.4	9.4	7.8	8.3	1	1	0.3	0.5
T4	18.1	11.8	9.9	6.4	1.5	1.2	3.4	0.9
T5	18.5	17.1	10.2	0.3	1.3	1.1	2.3	0.5
	|o__Bacteroidales	|o__Lachnospirales	k__Bacteria|p__Firmicutes|c__Clostridia|o__Oscillospirales	k__Bacteria|p__Proteobacteria|c__Gammaproteobacteria|o__Enterobacterales	k__Bacteria|p__Verrucomicrobiota|c__Verrucomicrobiae|o__Verrucomicrobiales	k__Bacteria|p__Firmicutes|c__Clostridia|o__Clostridia_vadinBB60	k__Bacteria|p__Firmicutes|c__Bacilli|o__Lactobacillales	k__Bacteria|p__Proteobacteria|c__Gammaproteobacteria|o__Burkholderiales
T1	50.8	7.4	7.2	4.2	2.4	1.5	1.3	1.2
T2	48	6.5	7.3	4	3.3	0.3	1.6	2.3
T3	46.9	9.9	8.2	4.9	3	0.6	0.9	2.3
T4	50.6	7.7	6.5	4.8	1.9	0.5	0.8	2.9
T5	43.2	13.9	8.6	6.7	0.2	0.2	1	3.7
	o__Bacteroidales	|o__Lachnospirales	k__Bacteria|p__Firmicutes|c__Clostridia|o__Oscillospirales	k__Bacteria|p__Proteobacteria|c__Gammaproteobacteria|o__Enterobacterales	k__Bacteria|p__Verrucomicrobiota|c__Verrucomicrobiae|o__Verrucomicrobiales	k__Bacteria|p__Firmicutes|c__Clostridia|o__Clostridia_vadinBB60	k__Bacteria|p__Firmicutes|c__Bacilli|o__Lactobacillales	k__Bacteria|p__Proteobacteria|c__Gammaproteobacteria|o__Burkholderiales
T1	14.5	5.1	6.2	7.3	5.2	5	1.5	1.2
T2	13.5	3.4	5.4	5.4	7.4	0.5	2.8	2.6
T3	9.3	4.3	4.5	7.9	8.4	1.4	0.8	2.3
T4	19	5	5.6	7.3	6.4	0.8	1.3	3.6
T5	18.3	10.6	5.8	7.8	0.4	0.2	1.1	6.2
	g__Bacteroides	|g__Prevotella_9	k__Bacteria|p__Firmicutes|c__Clostridia|o__Lachnospirales|f__Lachnospiraceae|g__Agathobacter	k__Bacteria|p__Bacteroidota|c__Bacteroidia|o__Bacteroidales|f__Rikenellaceae|g__Alistipes	k__Bacteria|p__Verrucomicrobiota|c__Verrucomicrobiae|o__Verrucomicrobiales|f__Akkermansiaceae|g__Akkermansia	k__Bacteria|p__Bacteroidota|c__Bacteroidia|o__Bacteroidales|f__Tannerellaceae|g__Parabacteroides	k__Bacteria|p__Proteobacteria|c__Gammaproteobacteria|o__Enterobacterales|f__Succinivibrionaceae|g__Succinivibrio	k__Bacteria|p__Bacteroidota|c__Bacteroidia|o__Bacteroidales|f__Prevotellaceae|g__Prevotella	k__Bacteria|p__Firmicutes|c__Clostridia|o__Lachnospirales|f__Lachnospiraceae|g__Butyrivibrio	k__Bacteria|p__Firmicutes|c__Clostridia|o__Lachnospirales|f__Lachnospiraceae|g__Eubacterium_eligens	k__Bacteria|p__Firmicutes|c__Clostridia|o__Oscillospirales|f__Ruminococcaceae|g__Subdoligranulum	k__Bacteria|p__Firmicutes|c__Clostridia|o__Oscillospirales|f__Ruminococcaceae|g__Ruminococcus	k__Bacteria|p__Proteobacteria|c__Gammaproteobacteria|o__Burkholderiales|f__Sutterellaceae|g__Sutterella	k__Bacteria|p__Proteobacteria|c__Gammaproteobacteria|o__Burkholderiales|f__Comamonadaceae|g__Comamonas
T1	25.3	14.8	2.9	2.8	2.8	2.5	1.8	1.7	1.6	0.7	0.6	0.5	0.3	0.2
T2	21.6	15.2	2.7	3	3.4	1.1	2.4	1.5	0.7	0.9	0.7	0.6	0.6	0.5
T3	22.7	14	3.8	2.1	3.2	1.2	3.5	1.2	0.9	1.5	0.8	1.2	0.9	0.7
T4	24.9	15	2.1	1.4	1.9	1.3	3	3.8	1	1	0.6	0.8	0.9	0.7
T5	20.2	16.2	6.7	1.9	0.3	0.7	1.7	2.2	0.7	1.6	1.2	1.1	1	2
	g__Bacteroides	|g__Prevotella_9	k__Bacteria|p__Firmicutes|c__Clostridia|o__Lachnospirales|f__Lachnospiraceae|g__Agathobacter	k__Bacteria|p__Bacteroidota|c__Bacteroidia|o__Bacteroidales|f__Rikenellaceae|g__Alistipes	k__Bacteria|p__Verrucomicrobiota|c__Verrucomicrobiae|o__Verrucomicrobiales|f__Akkermansiaceae|g__Akkermansia	k__Bacteria|p__Bacteroidota|c__Bacteroidia|o__Bacteroidales|f__Tannerellaceae|g__Parabacteroides	k__Bacteria|p__Proteobacteria|c__Gammaproteobacteria|o__Enterobacterales|f__Succinivibrionaceae|g__Succinivibrio	k__Bacteria|p__Bacteroidota|c__Bacteroidia|o__Bacteroidales|f__Prevotellaceae|g__Prevotella	k__Bacteria|p__Firmicutes|c__Clostridia|o__Lachnospirales|f__Lachnospiraceae|g__Butyrivibrio	k__Bacteria|p__Firmicutes|c__Clostridia|o__Lachnospirales|f__Lachnospiraceae|g__Eubacterium_eligens	k__Bacteria|p__Firmicutes|c__Clostridia|o__Oscillospirales|f__Ruminococcaceae|g__Subdoligranulum	k__Bacteria|p__Firmicutes|c__Clostridia|o__Oscillospirales|f__Ruminococcaceae|g__Ruminococcus	k__Bacteria|p__Proteobacteria|c__Gammaproteobacteria|o__Burkholderiales|f__Sutterellaceae|g__Sutterella	k__Bacteria|p__Proteobacteria|c__Gammaproteobacteria|o__Burkholderiales|f__Comamonadaceae|g__Comamonas
T1	17.1	20.5	2.6	5.3	6	3.9	6.6	3.4	2.8	0.5	0.4	0.3	0.3	0.5
T2	15.4	17.9	2.9	7	7.7	1	5.4	2.4	1.3	0.7	0.6	0.4	0.8	1.2
T3	14.5	17.4	2.8	2.6	8.7	0.9	8.1	1.5	1.7	1.5	0.6	1.1	1.4	2.1
T4	16.5	21.9	1.2	1.4	6.7	1.1	6.3	11.5	2.2	0.7	0.4	0.9	1.1	2
T5	16.2	20.5	8.4	2	0.4	0.6	4.4	3.2	1.2	1.6	1.5	1	1.7	7.9
