# Supplementary material for: Gut Microbiome and Cytokine Profiles in Post-COVID Syndrome
Source: Viruses. 2024 May 2;16(5):722. doi: 10.3390/v16050722 (PMC11126011; doi:10.3390/v16050722)
Supplement: Supplementary file 1 [file viruses-16-00722-s001.zip › Table S6.xlsx]

## Sheet: Sheet1
Supplementary table 6. Abundance of taxonomic features, metabolic pathways, and immune markers in covid group over time
taxon		T1-T5-friedman-pv	p-adj
1	k__Bacteria|p__Actinobacteriota|c__Coriobacteriia	0.0239811	0.259187
2	k__Bacteria|p__Actinobacteriota|c__Coriobacteriia|o__Coriobacteriales	0.0239811	0.259187
3	k__Bacteria|p__Firmicutes|c__Bacilli|o__Erysipelotrichales	0.0272966	0.259187
4	k__Bacteria|p__Firmicutes|c__Clostridia|o__Lachnospirales	0.029453	0.259187
5	k__Bacteria|p__Proteobacteria|c__Gammaproteobacteria|o__Burkholderiales	0.022207	0.259187
6	k__Bacteria|p__Bacteroidota|c__Bacteroidia|o__Bacteroidales|f__Tannerellaceae	0.0110759	0.194936
7	k__Bacteria|p__Firmicutes|c__Clostridia|o__Oscillospirales|f__[Eubacterium]_coprostanoligenes_group	0.00287952	0.0633495
8	k__Bacteria|p__Proteobacteria|c__Gammaproteobacteria|o__Burkholderiales|f__Sutterellaceae	0.00227529	0.0633495
9	k__Bacteria|p__Actinobacteriota|c__Coriobacteriia|o__Coriobacteriales|f__Coriobacteriaceae|g__Collinsella	0.0392246	0.297941
10	k__Bacteria|p__Bacteroidota|c__Bacteroidia|o__Bacteroidales|f__Tannerellaceae|g__Parabacteroides	0.0410682	0.297941
11	k__Bacteria|p__Firmicutes|c__Clostridia|o__Lachnospirales|f__Lachnospiraceae|g__[Eubacterium]_hallii_group	0.000493499	0.021714
12	k__Bacteria|p__Firmicutes|c__Clostridia|o__Lachnospirales|f__Lachnospiraceae|g__[Eubacterium]_hallii_group|s__[Eubacterium]_hallii	0.000250431	0.021714
13	k__Bacteria|p__Firmicutes|c__Clostridia|o__Oscillospirales|f__Ruminococcaceae|g__Ruminococcus|s__metagenome	0.044014	0.297941
metabolic pathways		T1-T5-friedman-pv	p-adj
1	aerobactin biosynthesis	0.04244518296	0.9425332293
2	homolactic fermentation	0.0132770825	0.8754207616
3	colanic acid building blocks biosynthesis	0.01547460942	0.8754207616
4	glycolysis I (from glucose 6-phosphate)	0.009206980402	0.8754207616
5	heme biosynthesis II (anaerobic)	0.04686237294	0.9425332293
6	L-methionine biosynthesis I	0.0486181366	0.9425332293
7	superpathway of L-lysine, L-threonine and L-methionine biosynthesis I	0.0389566859	0.9425332293
8	pentose phosphate pathway	0.03824060533	0.9425332293
9	meta cleavage pathway of aromatic compounds	0.01254332719	0.8754207616
10	glycolysis II (from fructose 6-phosphate)	0.008357141157	0.8754207616
11	allantoin degradation to glyoxylate III	0.03484592237	0.9425332293
12	chondroitin sulfate degradation I (bacterial)	0.02098119978	0.9231727902
13	superpathway of glucose and xylose degradation	0.04434206284	0.9425332293
14	chitin derivatives degradation	0.0245860535	0.9425332293
15	superpathway of GDP-mannose-derived O-antigen building blocks biosynthesis	0.03824060533	0.9425332293
16	mannan degradation	0.009947189034	0.8754207616
17	NAD salvage pathway I	0.01982112182	0.9231727902
18	flavin biosynthesis I (bacteria and plants)	0.008520727654	0.8754207616
Cytokines		T1-T5-friedman-pv	p-adj
1	Eotaxin	0.000003191545572	0.000111704095
2	FGF-2	0.00000937378051	0.0001611105151
3	sCD40L	0.00001380947272	0.0001611105151
4	Fractalkine	0.00004320307902	0.0003780269414
5	EGF	0.00006550150597	0.0004585105418
6	MIP-1b	0.0001374491906	0.0008017869454
7	MDC	0.0001928171819	0.0009640859094
8	TNFa	0.0002812674774	0.001230545214
9	IL-8	0.0003747255076	0.001457265863
10	G-CSF	0.0004265352578	0.001492873402
11	IP-10	0.0005221679567	0.001661443499
12	MCP-1	0.0008901298041	0.002596211929
13	IL-12P40	0.001209922069	0.003257482492
14	IL-10	0.00142699367	0.003567484175
15	IFN-a2	0.001809968979	0.00422326095
16	IL-1b	0.002009916998	0.004396693434
17	IL-1RA	0.004623405009	0.009518775018
18	IL-4	0.008759608337	0.01703257177
19	IL-7	0.02246944793	0.0413910883
